# Supplementary material for: Validation of the Portuguese Version of the Kansas City Cardiomyopathy Questionnaire-12
Source: MDPI journal article supplement (doi:10.3390/jcdd10040162), 2023-04-07
Supplement: s1 [file s1]

Table S1. Available Data 1

| hr       | nyha | nyha_dic | scholarity | age | lvef | gender | etiol | smok | packyears | height | weight | bmi | hipert | diabete | yslipidemi | atrialfyb | crt | ami | renaldis | stroke | cancer | ACI | ARB | Statins | Other anti | Nitrates | Betablock | Antiarrhytl | Antiplatelt | Anticoagul | Digitalis | Diuretics |   |
|----------|------|----------|------------|-----|------|--------|-------|------|-----------|--------|--------|-----|--------|---------|------------|-----------|-----|-----|----------|--------|--------|-----|-----|---------|------------|----------|-----------|-------------|-------------|------------|-----------|-----------|---|
| 55770577 | 2    | 1        | 2          | 62  | 2    | 0      | 2     | 0    | 4         | 1.57   | 79     | 2   | 1      | 1       | 1          | 0         | 0   | 0   | 0        | 0      | 0      | 0   | 0   | 1       | 1          | 0        | 1         | 0           | 1           | 0          | 0         | 1         |   |
| 55777324 | 3    | 2        |            | 51  | 1    | 1      | 2     | 0    | 105       | 1.7    | 134    | 2   | 1      | 0       | 0          | 0         | 0   | 0   | 0        | 0      | 0      | 0   | 1   | 0       | 0          | 0        | 1         | 0           | 0           | 0          | 0         | 1         |   |
| 55481870 | 3    | 2        | 2          | 50  | 1    | 1      | 2     | 0    | 0         | 1.7    | 93     | 2   | 1      | 1       | 1          | 0         | 0   | 0   | 0        | 0      | 0      | 0   | 1   | 0       | 1          | 1        | 0         | 1           | 0           | 0          | 0         | 1         |   |
| 55788469 | 3    | 2        | 2          | 54  | 1    | 1      | 2     | 0    | 0         | 1.63   | 74     | 1   | 0      | 0       | 0          | 0         | 0   | 0   | 0        | 0      | 0      | 1   | 0   | 0       | 0          | 0        | 1         | 0           | 0           | 0          | 0         | 1         |   |
| 55760743 | 2    | 1        | 2          | 76  | 1    | 1      | 1     | 0    | 55        | 1.6    | 100    | 2   | 1      | 0       | 1          | 0         | 0   | 1   | 1        | 1      | 0      | 0   | 0   | 1       | 1          | 1        | 0         | 1           | 0           | 1          | 0         | 0         | 1 |
| 55790116 | 3    | 2        | 2          | 46  | 1    | 1      | 2     | 0    | 0         | 1.78   | 91     | 1   | 0      | 0       | 0          | 0         | 0   | 0   | 0        | 0      | 0      | 1   | 0   | 0       | 1          | 0        | 1         | 0           | 0           | 0          | 0         | 1         |   |
| 55390394 | 3    | 2        | 1          | 54  | 1    | 1      | 2     | 0    | 0         | 1.73   | 89     | 1   | 1      | 1       | 1          | 0         | 0   | 1   | 1        | 0      | 1      | 1   | 0   | 1       | 1          | 1        | 1         | 0           | 1           | 0          | 0         | 1         |   |
| 5086459C | 3    | 2        | 2          | 63  | 1    | 1      | 2     | 0    | 0         | 1.86   | 72     | 1   | 1      | 1       | 1          | 1         | 0   | 0   | 0        | 0      | 0      | 1   | 0   | 1       | 0          | 0        | 1         | 1           | 0           | 1          | 0         | 1         |   |
| 55785739 | 1    | 1        | 2          | 67  | 1    | 1      | 2     | 0    | 0         | 1.72   | 79     | 1   | 0      | 0       | 0          | 0         | 1   | 0   | 0        | 0      | 0      | 0   | 1   | 0       | 0          | 0        | 0         | 1           | 0           | 0          | 0         | 0         | 1 |
| 55775622 | 3    | 2        | 1          | 66  | 1    | 1      | 1     | 0    | 42        | 1.7    | 86     | 1   | 0      | 0       | 0          | 0         | 0   | 0   | 0        | 0      | 0      | 1   | 0   | 1       | 0          | 0        | 0         | 1           | 0           | 1          | 0         | 0         | 1 |
| 53742635 | 1    | 1        | 2          | 54  | 2    | 1      | 2     | 0    | 0         | 1.7    | 65     | 1   | 1      | 1       | 0          | 0         | 0   | 0   | 1        | 0      | 0      | 0   | 0   | 1       | 1          | 0        | 0         | 1           | 0           | 1          | 0         | 0         | 1 |
| 55706936 | 3    | 2        | 2          | 69  | 1    | 0      | 2     | 0    | 0         | 1.55   | 68     | 1   | 0      | 1       | 1          | 0         | 1   | 0   | 0        | 0      | 0      | 0   | 1   | 1       | 1          | 0        | 0         | 1           | 0           | 0          | 0         | 1         | 1 |
| 55613740 | 2    | 1        | 2          | 30  | 2    | 0      | 2     | 0    | 10        | 1.65   | 73     | 1   | 0      | 0       | 0          | 0         | 0   | 0   | 0        | 0      | 0      | 1   | 0   | 0       | 0          | 0        | 1         | 0           | 0           | 0          | 0         | 0         | 1 |
| 55770092 | 2    | 1        | 2          | 40  | 1    | 0      | 2     | 0    | 0         | 1.6    | 82     | 2   | 0      | 0       | 0          | 0         | 0   | 0   | 0        | 0      | 0      | 0   | 1   | 0       | 0          | 0        | 1         | 0           | 0           | 0          | 0         | 0         | 1 |
| 5352913K | 1    | 1        | 2          | 54  | 2    | 0      | 2     | 0    | 0         | 1.48   | 55     | 1   | 0      | 1       | 0          | 0         | 1   | 0   | 0        | 0      | 0      | 0   | 0   | 1       | 1          | 0        | 0         | 1           | 0           | 0          | 0         | 0         | 1 |
| 55788080 | 1    | 1        | 2          | 47  | 2    | 1      | 2     | 0    | 35        | 1.82   | 100    | 2   | 0      | 0       | 0          | 0         | 0   | 0   | 0        | 0      | 0      | 1   | 0   | 0       | 1          | 1        | 1         | 0           | 0           | 0          | 0         | 0         | 1 |
| 2979371I | 1    | 1        | 2          | 64  | 1    | 1      | 2     | 0    | 0         | 1.63   | 65     | 1   | 1      | 0       | 0          | 0         | 0   | 0   | 0        | 0      | 0      | 1   | 0   | 0       | 0          | 0        | 1         | 0           | 0           | 0          | 0         | 0         | 1 |
| 55603816 | 3    | 2        |            | 68  | 1    | 1      | 2     | 0    | 41        | 1.88   | 96     | 1   | 1      | 1       | 0          | 0         | 0   | 0   | 0        | 0      | 0      | 0   | 1   | 1       | 1          | 0        | 0         | 1           | 0           | 1          | 0         | 0         | 1 |
| 55710514 | 3    | 2        | 2          | 65  | 1    | 0      | 2     | 0    | 0         | 1.68   | 80     | 1   | 1      | 0       | 0          | 1         | 2   | 0   | 0        | 0      | 0      | 0   | 1   | 0       | 0          | 0        | 1         | 0           | 0           | 0          | 0         | 1         | 1 |
| 55789620 | 2    | 1        | 2          | 64  | 2    | 1      | 2     | 0    | 0         | 1.64   | 77     | 1   | 1      | 1       | 0          | 1         | 0   | 0   | 0        | 0      | 0      | 0   | 0   | 1       | 1          | 0        | 0         | 1           | 0           | 1          | 0         | 0         | 1 |
| 77081413 | 2    | 1        | 2          | 70  | 1    | 1      | 1     | 0    | 0         | 1.85   | 84     | 1   | 1      | 1       | 0          | 0         | 2   | 1   | 1        | 0      | 0      | 0   | 1   | 0       | 1          | 1        | 1         | 1           | 0           | 0          | 0         | 0         | 1 |
| 55790461 | 3    | 2        | 1          | 63  | 1    | 0      | 2     | 0    | 0         | 1.46   | 54     | 1   | 0      | 0       | 0          | 0         | 0   | 0   | 0        | 0      | 0      | 1   | 0   | 0       | 0          | 0        | 1         | 0           | 1           | 0          | 1         | 1         |   |
| 55613421 | 3    | 2        | 1          | 56  | 2    | 1      | 2     | 0    | 0         | 1.7    | 89     | 2   | 1      | 1       | 0          | 0         | 0   | 0   | 0        | 0      | 0      | 0   | 1   | 1       | 1          | 0        | 0         | 1           | 0           | 0          | 0         | 0         | 1 |
| 55790914 | 3    | 2        | 1          | 58  | 2    | 1      | 2     | 0    | 0         | 1.68   | 60     | 1   | 0      | 1       | 0          | 0         | 0   | 0   | 0        | 0      | 0      | 1   | 0   | 1       | 0          | 0        | 1         | 0           | 1           | 0          | 0         | 0         | 1 |
| 55746283 | 3    | 2        | 2          | 65  | 2    | 0      | 2     | 0    | 0         | 1.7    | 70     | 1   | 1      | 1       | 0          | 0         | 0   | 0   | 0        | 0      | 0      | 0   | 1   | 1       | 1          | 1        | 1         | 1           | 0           | 0          | 0         | 0         | 1 |
| 55776979 | 2    | 1        | 2          | 54  | 1    | 0      | 2     | 1    | 40        | 1.55   | 50     | 1   | 1      | 0       | 1          | 0         | 0   | 0   | 0        | 0      | 0      | 0   | 0   | 1       | 0          | 1        | 1         | 1           | 0           | 1          | 0         | 0         | 1 |
| 55783321 | 4    | 2        | 2          | 59  | 1    | 1      | 1     | 0    | 40        | 1.73   | 78     | 1   | 1      | 0       | 0          | 0         | 0   | 1   | 0        | 0      | 0      | 0   | 1   | 0       | 1          | 1        | 1         | 1           | 0           | 0          | 1         | 0         | 1 |
| 2608935F | 1    | 1        | 1          | 51  | 1    | 1      | 2     | 0    | 5         | 1.8    | 73     | 1   | 1      | 0       | 0          | 0         | 0   | 0   | 0        | 0      | 0      | 1   | 0   | 0       | 0          | 0        | 0         | 1           | 0           | 0          | 0         | 0         | 1 |
| 55609570 | 3    | 2        | 2          | 37  | 1    | 0      | 2     | 0    | 0         | 1.68   | 102    | 2   | 0      | 0       | 0          | 0         | 0   | 0   | 0        | 0      | 0      | 0   | 0   | 0       | 1          | 0        | 1         | 0           | 1           | 0          | 0         | 0         | 1 |
| 90983721 | 3    | 2        | 2          | 72  | 1    | 1      | 2     | 0    | 0         | 1.88   | 76     | 1   | 1      | 1       | 0          | 1         | 0   | 0   | 0        | 0      | 0      | 1   | 0   | 1       | 0          | 0        | 1         | 0           | 0           | 0          | 1         | 0         | 1 |
| 55786816 | 3    | 2        | 1          | 76  | 2    | 1      | 2     | 0    | 4         | 1.74   | 82     | 1   | 0      | 1       | 1          | 1         | 0   | 0   | 0        | 0      | 0      | 0   | 1   | 0       | 1          | 0        | 0         | 1           | 0           | 0          | 1         | 0         | 1 |
| 55587351 | 1    | 1        |            | 50  | 1    | 1      | 2     | 0    | 0         | 1.73   | 89     | 1   | 1      | 0       | 0          | 1         | 0   | 0   | 1        | 0      | 0      | 0   | 1   | 1       | 0          | 0        | 1         | 0           | 0           | 0          | 0         | 0         | 1 |
| 55789533 | 3    | 2        | 2          | 62  | 2    | 0      | 2     | 0    | 80        | 1.6    | 90     | 2   | 1      | 0       | 0          | 1         | 0   | 0   | 0        | 0      | 0      | 0   | 1   | 0       | 0          | 0        | 1         | 0           | 0           | 0          | 0         | 0         | 1 |
| 55384334 | 1    | 1        | 2          | 69  | 2    | 1      | 1     | 0    | 40        | 1.73   | 85     | 1   | 1      | 1       | 1          | 0         | 0   | 0   | 0        | 0      | 0      | 0   | 1   | 1       | 1          | 0        | 0         | 1           | 0           | 1          | 0         | 0         | 1 |
| 55784026 | 3    | 2        | 2          | 37  | 1    | 1      | 1     | 0    | 0         | 1.72   | 91     | 2   | 1      | 0       | 0          | 0         | 0   | 1   | 0        | 0      | 0      | 0   | 1   | 0       | 1          | 1        | 1         | 1           | 0           | 1          | 0         | 0         | 1 |
| 55790032 | 3    | 2        |            | 50  | 2    | 1      | 2     | 0    | 0         | 1.81   | 78     | 1   | 1      | 0       | 0          | 1         | 0   | 0   | 0        | 0      | 0      | 1   | 0   | 0       | 0          | 1        | 1         | 1           | 0           | 0          | 1         | 0         | 1 |
| 2835602B | 1    | 1        | 2          | 49  | 1    | 1      | 2     | 0    | 0         | 1.68   | 121    | 2   | 1      | 0       | 0          | 0         | 1   | 1   | 0        | 0      | 0      | 0   | 1   | 1       | 1          | 1        | 1         | 1           | 0           | 0          | 1         | 0         | 1 |
| 55770226 | 3    | 2        | 1          | 75  | 2    | 1      | 1     | 0    | 0         | 1.63   | 72     | 1   | 1      | 1       | 1          | 0         | 0   | 0   | 1        | 0      | 0      | 0   | 1   | 0       | 1          | 0        | 0         | 1           | 0           | 1          | 0         | 0         | 1 |
| 55783548 | 3    | 2        | 2          | 47  | 1    | 1      | 2     | 0    | 1         | 1.76   | 106    | 2   | 1      | 1       | 0          | 0         | 0   | 0   | 0        | 0      | 0      | 0   | 0   | 1       | 0          | 1        | 0         | 1           | 0           | 0          | 0         | 0         | 1 |
| 55789369 | 3    | 2        | 1          | 63  | 1    | 0      | 2     | 0    | 10        | 1.75   | 80     | 1   | 0      | 0       | 0          | 1         | 0   | 0   | 0        | 0      | 0      | 0   | 0   | 1       | 0          | 0        | 0         | 1           | 0           | 0          | 0         | 0         | 1 |
| 55785302 | 2    | 1        | 2          | 62  | 1    | 0      | 2     | 0    | 30        | 1.6    | 90     | 2   | 1      | 0       | 0          | 0         | 0   | 0   | 0        | 0      | 0      | 0   | 0   | 1       | 0          | 0        | 0         | 1           | 0           | 0          | 1         | 0         | 1 |
| 55780493 | 3    | 2        | 2          | 56  | 1    | 1      | 2     | 0    | 20        | 1.76   | 80     | 1   | 0      | 1       | 1          | 0         | 0   | 0   | 0        | 0      | 0      | 0   | 0   | 0       | 1          | 1        | 0         | 1           | 0           | 1          | 0         | 0         | 1 |
| 55791505 | 1    | 1        |            | 69  | 2    | 1      | 2     | 0    | 0         | 1.9    | 75     | 1   | 1      | 1       | 1          | 0         | 0   | 0   | 1        | 0      | 0      | 0   | 0   | 1       | 1          | 0        | 0         | 0           | 0           | 1          | 0         | 0         | 1 |
| 55744562 | 1    | 1        | 2          | 64  | 1    | 1      | 2     | 0    | 40        | 1.74   | 67     | 1   | 1      | 0       | 1          | 0         | 0   | 0   | 0        | 0      | 0      | 0   | 0   | 1       | 1          | 1        | 1         | 1           | 0           | 0          | 0         | 0         | 1 |
| 55542539 | 3    | 2        | 2          | 51  | 1    | 1      | 2     | 0    | 0         | 1.72   | 77     | 1   | 0      | 0       | 0          | 0         | 0   | 0   | 0        | 0      | 0      | 0   | 1   | 0       | 0          | 1        | 0         | 0           | 0           | 0          | 0         | 1         | 1 |
| 90234540 | 3    | 2        | 2          | 53  | 1    | 1      | 2     | 0    | 20        | 1.78   | 85     | 1   | 1      | 1       | 0          | 0         | 0   | 0   | 0        | 0      | 0      | 1   | 0   | 0       | 1          | 0        | 0         | 1           | 0           | 1          | 0         | 0         | 1 |
| 55779955 | 3    | 2        | 2          | 48  | 1    | 1      | 2     | 0    | 0         | 1.85   | 105    | 2   | 1      | 0       | 1          | 0         | 0   | 0   | 0        | 0      | 0      | 0   | 0   | 1       | 1          | 1        | 1         | 1           | 1           | 0          | 0         | 0         | 1 |
| 55789662 | 4    | 2        | 2          | 42  | 2    | 0      | 1     | 0    | 0         | 1.79   | 70     | 1   | 0      | 1       | 0          | 0         | 0   | 1   | 0        | 0      | 0      | 0   | 0   | 0       | 1          | 1        | 1         | 1           | 0           | 0          | 1         | 0         | 1 |
| 55746164 | 2    | 1        | 2          | 50  | 1    | 1      | 1     | 0    | 13        | 1.75   | 84     | 1   | 0      | 0       | 0          | 0         | 2   | 1   | 0        | 0      | 0      | 0   | 1   | 0       | 1          | 0        | 0         | 1           | 0           | 1          | 1         | 0         | 1 |
| 55589616 | 2    | 1        | 2          | 63  | 1    | 1      | 1     | 0    | 0         | 1.7    | 95     | 2   | 1      | 1       | 0          | 0         | 0   | 2   | 1        | 0      | 0      | 0   | 1   | 0       | 1          | 1        | 1         | 1           | 1           | 0          | 0         | 0         | 1 |
| 55776882 | 3    | 2        |            | 69  | 2    | 0      | 1     | 0    | 20        | 1.71   | 73     | 1   | 0      | 0       | 0          | 0         | 0   | 1   | 0        | 0      | 0      | 0   | 1   | 0       | 1          | 0        | 0         | 1           | 0           | 1          | 0         | 0         | 1 |
| 55783641 | 1    | 1        | 1          | 66  | 2    | 0      | 2     | 0    | 0         | 1.5    | 68     | 2   | 1      | 0       | 0          | 0         | 0   | 0   | 0        | 0      | 0      | 0   | 1   | 0       | 1          | 1        | 0         | 1           | 0           | 1          | 0         | 0         | 1 |
| 55397926 | 3    | 2        | 2          | 65  | 2    | 0      | 2     | 0    | 0         | 1.7    | 71     | 1   | 1      | 1       | 1          | 1         | 1   | 0   | 0        | 0      | 0      | 0   | 0   | 1       | 1          | 0        | 0         | 1           | 0           | 0          | 1         | 0         | 1 |
| 88240238 | 3    | 2        | 2          | 44  | 2    | 0      | 1     | 0    | 20        | 1.65   | 72     | 1   | 0      | 1       | 0          | 0         | 0   | 1   | 0        | 0      | 0      | 0   | 1   | 0       | 1          | 0        | 0         | 1           | 0           | 0          | 1         | 0         | 1 |
| 55782692 | 2    | 1        |            | 56  | 1    | 1      | 1     | 0    | 0         | 1.73   | 100    | 2   | 1      | 0       | 0          | 1         | 0   | 1   | 0        | 0      | 0      | 0   | 1   | 0       | 1          | 0        | 0         | 1           | 1           | 0          | 1         | 1         | 1 |
| 55775827 | 1    | 1        | 1</        |     |      |        |       |      |           |        |        |     |        |         |            |           |     |     |          |        |        |     |     |         |            |          |           |             |             |            |           |           |   |

| hr       | nyha | nyha_dic | scholarity | age | lvef | gender | etiol | smok | packyears | height | weight | bmi | hipert | diabete | yslipidemi | atrialfyb | crt | ami | renaldis | stroke | cancer | ACI | ARB | Statins | Other anti | Nitrates | Betablock | Antiarrhytl | Antiplatelt | Anticoagul | Digitalis | Diuretics |   |   |
|----------|------|----------|------------|-----|------|--------|-------|------|-----------|--------|--------|-----|--------|---------|------------|-----------|-----|-----|----------|--------|--------|-----|-----|---------|------------|----------|-----------|-------------|-------------|------------|-----------|-----------|---|---|
| 55612119 | 3    | 2        | 2          | 62  | 1    | 1      | 1     | 0    | 6         | 1.63   | 70     | 1   | 0      | 1       | 0          | 0         | 0   | 1   | 1        | 0      | 0      | 0   | 1   | 0       | 1          | 0        | 0         | 1           | 0           | 1          | 0         | 1         |   |   |
| 13701232 | 2    | 1        | 2          | 64  | 1    | 1      | 1     | 0    | 90        | 1.65   | 79     | 1   | 0      | 0       | 1          | 0         | 0   | 1   | 0        | 0      | 0      | 0   | 0   | 1       | 1          | 0        | 0         | 1           | 0           | 1          | 0         | 1         |   |   |
| 55790931 | 2    | 1        | 55790931   | 68  | 2    | 1      | 1     | 0    | 0         | 1.68   | 88     | 2   | 1      | 0       | 1          | 0         | 0   | 0   | 0        | 0      | 0      | 0   | 1   | 0       | 1          | 0        | 1         | 1           | 1           | 0          | 0         | 1         |   |   |
| 55782703 | 1    | 1        |            | 61  | 1    | 1      | 2     | 0    | 0         | 1.7    | 85     | 1   | 1      | 0       | 0          | 0         | 0   | 0   | 0        | 0      | 0      | 1   | 0   | 0       | 1          | 1        | 1         | 0           | 0           | 0          | 0         | 1         |   |   |
| 55767433 | 3    | 2        | 1          | 69  | 2    | 0      | 1     | 0    | 0         | 1.59   | 49     | 1   | 1      | 0       | 0          | 1         | 1   | 0   | 0        | 1      | 0      | 1   | 0   | 1       | 0          | 0        | 1         | 0           | 0           | 1          | 1         | 1         |   |   |
| 55783080 | 3    | 2        | 2          | 46  | 2    | 0      | 1     | 0    | 0         | 1.7    | 88     | 2   | 1      | 1       | 0          | 0         | 0   | 1   | 0        | 0      | 0      | 0   | 0   | 1       | 0          | 0        | 0         | 1           | 0           | 1          | 0         | 0         | 1 |   |
| 55789845 | 2    | 1        | 2          | 45  | 1    | 1      | 2     | 0    | 42        | 1.8    | 87     | 1   | 0      | 0       | 0          | 0         | 0   | 0   | 0        | 0      | 0      | 0   | 1   | 0       | 0          | 0        | 0         | 1           | 0           | 0          | 0         | 0         | 1 |   |
| 3032151E | 2    | 1        | 2          | 57  | 1    | 1      | 2     | 1    | 40        | 1.82   | 67     | 1   | 0      | 0       | 0          | 1         | 0   | 0   | 0        | 0      | 0      | 0   | 1   | 0       | 0          | 0        | 0         | 1           | 1           | 0          | 1         | 0         | 1 |   |
| 55775470 | 3    | 2        | 2          | 55  | 1    | 1      | 2     | 0    | 100       | 1.9    | 113    | 2   | 1      | 0       | 0          | 0         | 0   | 0   | 0        | 0      | 0      | 0   | 1   | 0       | 0          | 1        | 0         | 1           | 0           | 0          | 0         | 0         | 1 |   |
| 55786707 | 3    | 2        | 2          | 47  | 1    | 1      | 1     | 0    | 10        | 1.9    | 92     | 1   | 1      | 1       | 0          | 0         | 0   | 1   | 0        | 0      | 0      | 0   | 0   | 1       | 1          | 1        | 1         | 1           | 0           | 1          | 0         | 1         | 1 |   |
| 55755812 | 3    | 2        | 2          | 75  | 2    | 0      | 2     | 0    | 0         | 1.53   | 58     | 1   | 1      | 0       | 0          | 0         | 0   | 0   | 0        | 0      | 0      | 1   | 0   | 1       | 1          | 1        | 1         | 1           | 0           | 0          | 0         | 0         | 1 |   |
| 55774371 | 2    | 1        | 1          | 71  | 2    | 0      | 2     | 0    | 0         | 1.52   | 68     | 1   | 1      | 1       | 1          | 0         | 0   | 1   | 0        | 0      | 1      | 0   | 1   | 1       | 1          | 0        | 0         | 1           | 0           | 0          | 0         | 0         | 1 |   |
| 55601087 | 2    | 1        | 1          | 65  | 1    | 0      | 2     | 0    | 0         | 1.66   | 65     | 1   | 1      | 1       | 0          | 0         | 0   | 0   | 0        | 0      | 0      | 0   | 1   | 0       | 0          | 1        | 1         | 1           | 0           | 0          | 1         | 0         | 1 |   |
| 3101067E | 3    | 2        | 2          | 53  | 1    | 0      | 2     | 0    | 0         | 1.68   | 62     | 1   | 0      | 0       | 0          | 0         | 0   | 0   | 0        | 0      | 0      | 0   | 1   | 0       | 0          | 0        | 0         | 1           | 0           | 0          | 0         | 0         | 1 |   |
| 55777332 | 3    | 2        | 2          | 49  | 2    | 0      | 2     | 0    | 25        | 1.5    | 63     | 1   | 1      | 1       | 0          | 0         | 1   | 0   | 0        | 0      | 0      | 0   | 1   | 0       | 1          | 0        | 0         | 1           | 0           | 0          | 0         | 1         | 1 |   |
| 33569184 | 3    | 2        | 1          | 69  | 1    | 0      | 2     | 0    | 118       | 1.6    | 65     | 1   | 0      | 1       | 0          | 0         | 0   | 0   | 0        | 0      | 0      | 0   | 1   | 0       | 0          | 0        | 0         | 1           | 0           | 0          | 0         | 0         | 0 |   |
| 55764026 | 1    | 1        | 2          | 64  | 1    | 0      | 2     | 0    | 10        | 1.43   | 43     | 1   | 0      | 0       | 0          | 0         | 0   | 0   | 0        | 0      | 0      | 0   | 0   | 1       | 0          | 0        | 0         | 1           | 0           | 0          | 0         | 0         | 1 |   |
| 55569349 | 3    | 2        | 1          | 68  | 2    | 0      | 1     | 0    | 0         | 1.7    | 73.5   | 1   | 1      | 1       | 1          | 1         | 0   | 1   | 0        | 0      | 0      | 0   | 0   | 1       | 1          | 1        | 0         | 0           | 1           | 0          | 1         | 0         | 1 |   |
| 55788219 | 2    | 1        | 2          | 51  | 1    | 0      | 2     | 0    | 0         | 1.57   | 64     | 1   | 1      | 0       | 0          | 0         | 0   | 0   | 0        | 0      | 0      | 0   | 0   | 1       | 0          | 0        | 1         | 1           | 0           | 1          | 0         | 1         | 1 |   |
| 5142060K | 3    | 2        | 2          | 64  | 2    | 0      | 2     | 0    | 0         | 1.7    | 80     | 1   | 0      | 0       | 0          | 0         | 1   | 0   | 0        | 0      | 0      | 0   | 0   | 1       | 0          | 0        | 0         | 1           | 0           | 0          | 1         | 1         | 1 |   |
| 55764014 | 3    | 2        | 1          | 63  | 1    | 0      | 2     | 0    | 0         | 1.55   | 64     | 1   | 1      | 1       | 1          | 0         | 0   | 0   | 0        | 0      | 0      | 0   | 0   | 1       | 1          | 1        | 1         | 1           | 0           | 1          | 0         | 0         | 1 |   |
| 55604288 | 3    | 2        | 1          | 73  | 2    | 0      | 1     | 0    | 0         | 1.58   | 54     | 1   | 1      | 0       | 0          | 0         | 0   | 1   | 0        | 0      | 0      | 1   | 0   | 1       | 0          | 0        | 1         | 0           | 1           | 0          | 0         | 0         | 1 |   |
| 15128349 | 1    | 1        | 2          | 68  | 2    | 1      | 1     | 1    | 25        | 1.75   | 66     | 1   | 1      | 1       | 0          | 0         | 0   | 1   | 0        | 0      | 0      | 0   | 1   | 0       | 1          | 0        | 0         | 1           | 0           | 1          | 0         | 0         | 0 |   |
| 55443214 | 4    | 2        | 2          | 66  | 2    | 0      | 1     | 0    | 0         | 1.6    | 60     | 1   | 1      | 1       | 1          | 0         | 0   | 1   | 1        | 0      | 0      | 0   | 0   | 1       | 1          | 1        | 0         | 1           | 0           | 1          | 0         | 0         | 1 |   |
| 55788727 | 3    | 2        | 2          | 45  | 1    | 1      | 1     | 0    | 6         | 1.8    | 94     | 1   | 1      | 0       | 0          | 1         | 0   | 1   | 0        | 0      | 0      | 0   | 1   | 0       | 1          | 0        | 0         | 1           | 1           | 0          | 1         | 1         | 1 |   |
| 55787575 | 1    | 1        | 2          | 56  | 2    | 1      | 1     | 0    | 0         | 1.7    | 92     | 2   | 0      | 1       | 0          | 0         | 0   | 1   | 0        | 0      | 0      | 0   | 1   | 0       | 1          | 0        | 0         | 1           | 0           | 1          | 0         | 0         | 1 |   |
| 55748411 | 1    | 1        | 1          | 50  | 1    | 1      | 2     | 0    | 0         | 1.8    | 100    | 2   | 1      | 1       | 0          | 0         | 0   | 0   | 0        | 0      | 0      | 0   | 1   | 0       | 1          | 0        | 0         | 1           | 0           | 1          | 0         | 0         | 1 |   |
| 5295663I | 3    | 2        | 1          | 53  | 1    | 1      | 2     | 0    | 12        | 1.65   | 60     | 1   | 0      | 0       | 0          | 1         | 0   | 0   | 0        | 0      | 0      | 0   | 1   | 0       | 1          | 0        | 0         | 1           | 0           | 0          | 1         | 1         | 1 |   |
| 55788277 | 3    | 2        | 2          | 63  | 2    | 0      | 1     | 1    | 46        | 1.65   | 70     | 1   | 1      | 0       | 1          | 0         | 0   | 1   | 0        | 0      | 0      | 0   | 1   | 0       | 1          | 0        | 0         | 1           | 0           | 1          | 0         | 0         | 1 |   |
| 55606634 | 3    | 2        | 55768059   | 66  | 2    | 0      | 2     | 0    | 0         | 1.77   | 79     | 1   | 1      | 0       | 0          | 0         | 0   | 0   | 0        | 0      | 0      | 0   | 0   | 0       | 1          | 1        | 0         | 0           | 1           | 0          | 0         | 0         | 1 |   |
| 55768059 | 3    | 2        |            | 66  | 1    | 1      | 2     | 0    | 35        | 1.77   | 98     | 2   | 1      | 0       | 1          | 1         | 0   | 0   | 0        | 0      | 0      | 0   | 0   | 0       | 1          | 0        | 0         | 1           | 0           | 0          | 1         | 0         | 1 |   |
| 2651794B | 3    | 2        | 2          | 68  | 2    | 1      | 2     | 0    | 0         | 1.65   | 46     | 1   | 0      | 0       | 0          | 1         | 2   | 0   | 0        | 0      | 0      | 0   | 1   | 0       | 0          | 0        | 1         | 1           | 1           | 0          | 0         | 0         | 1 |   |
| 55748108 | 3    | 2        | 2          | 64  | 1    | 1      | 2     | 0    | 60        | 1.75   | 95     | 2   | 1      | 1       | 1          | 0         | 0   | 0   | 0        | 0      | 0      | 0   | 1   | 0       | 0          | 0        | 0         | 1           | 0           | 1          | 0         | 0         | 1 |   |
| 55791784 | 2    | 1        | 2          | 67  | 1    | 1      | 2     | 0    | 0         | 1.77   | 68     | 1   | 1      | 0       | 0          | 0         | 0   | 0   | 0        | 0      | 0      | 0   | 0   | 1       | 1          | 0        | 0         | 1           | 0           | 1          | 0         | 0         | 1 |   |
| 55785679 | 3    | 2        | 2          | 53  | 1    | 1      | 2     | 0    | 0         | 1.6    | 65     | 1   | 0      | 0       | 0          | 0         | 0   | 0   | 0        | 0      | 0      | 0   | 1   | 0       | 0          | 0        | 0         | 1           | 0           | 0          | 0         | 0         | 1 |   |
| 55779636 | 2    | 1        | 1          | 61  | 1    | 1      | 2     | 0    | 2,5       | 1.78   | 80     | 1   | 0      | 0       | 0          | 0         | 0   | 0   | 0        | 0      | 0      | 0   | 1   | 0       | 0          | 1        | 0         | 0           | 0           | 0          | 1         | 0         | 0 |   |
| 55776576 | 3    | 2        | 2          | 38  | 1    | 0      | 1     | 0    | 7,5       | 1.75   | 72     | 1   | 1      | 0       | 1          | 0         | 0   | 1   | 0        | 0      | 0      | 0   | 1   | 0       | 1          | 1        | 1         | 1           | 0           | 1          | 0         | 0         | 1 |   |
| 55784190 | 3    | 2        | 2          | 46  | 1    | 1      | 2     | 0    | 0         | 1.7    | 75     | 1   | 0      | 0       | 0          | 0         | 0   | 0   | 1        | 0      | 0      | 0   | 1   | 0       | 0          | 0        | 0         | 1           | 0           | 0          | 0         | 0         | 1 |   |
| 55592064 | 2    | 1        | 2          | 39  | 1    | 0      | 2     | 0    | 0         | 1.5    | 60     | 1   | 1      | 0       | 1          | 0         | 2   | 0   | 0        | 0      | 0      | 0   | 1   | 0       | 0          | 0        | 0         | 1           | 1           | 0          | 0         | 0         | 1 |   |
| 55776342 | 2    | 1        | 2949097E   | 36  | 2    | 0      | 1     | 0    | 0         | 1.87   | 80     | 1   | 1      | 0       | 0          | 0         | 0   | 1   | 0        | 0      | 0      | 0   | 1   | 0       | 0          | 0        | 0         | 1           | 0           | 0          | 1         | 0         | 1 |   |
| 2949097E | 3    | 2        |            | 78  | 1    | 0      | 2     | 0    | 0         | 1.45   | 50     | 1   | 1      | 1       | 1          | 0         | 1   | 0   | 0        | 0      | 0      | 0   | 0   | 1       | 1          | 1        | 0         | 1           | 0           | 1          | 0         | 1         | 1 |   |
| 55772440 | 2    | 1        | 2          | 30  | 2    | 1      | 2     | 0    | 0         | 1.63   | 53     | 1   | 0      | 0       | 0          | 0         | 0   | 0   | 0        | 0      | 0      | 0   | 1   | 0       | 0          | 0        | 0         | 1           | 0           | 0          | 0         | 0         | 0 |   |
| 2955647J | 3    | 2        | 1          | 56  | 2    | 1      | 2     | 0    | 0         | 1.84   | 73     | 1   | 0      | 0       | 0          | 1         | 2   | 0   | 0        | 0      | 0      | 0   | 0   | 1       | 0          | 0        | 0         | 1           | 1           | 0          | 1         | 0         | 1 |   |
| 55583776 | 2    | 1        | 2          | 58  | 2    | 1      | 1     | 0    | 0         | 1.7    | 75     | 1   | 0      | 0       | 0          | 0         | 0   | 1   | 0        | 0      | 0      | 0   | 0   | 1       | 0          | 0        | 0         | 0           | 0           | 0          | 0         | 0         | 1 |   |
| 55790131 | 3    | 2        | 2          | 75  | 1    | 1      | 1     | 0    | 0         | 1.85   | 110    | 2   | 1      | 1       | 0          | 0         | 0   | 0   | 0        | 0      | 0      | 0   | 0   | 1       | 1          | 1        | 1         | 1           | 0           | 1          | 0         | 1         |   |   |
| 55786416 | 1    | 1        | 2          | 52  | 1    | 1      | 1     | 0    | 0         | 1.87   | 102    | 1   | 0      | 1       | 1          | 1         | 0   | 1   | 0        | 0      | 0      | 0   | 1   | 0       | 0          | 1        | 0         | 0           | 1           | 0          | 0         | 1         | 1 |   |
| 5252340C | 1    | 1        | 2          | 52  | 1    | 1      | 2     | 1    | 3,75      | 1.78   | 98     | 2   | 0      | 1       | 0          | 1         | 0   | 0   | 0        | 0      | 0      | 0   | 1   | 0       | 0          | 0        | 0         | 1           | 0           | 0          | 1         | 1         | 1 |   |
| 13981413 | 3    | 2        | 2          | 68  | 2    | 0      | 1     | 0    | 0         | 1.6    | 70     | 1   | 1      | 1       | 1          | 0         | 0   | 0   | 0        | 0      | 0      | 0   | 0   | 1       | 0          | 0        | 0         | 0           | 1           | 0          | 1         | 0         | 0 | 1 |
| 55779073 | 3    | 2        | 2          | 65  | 1    | 1      | 2     | 0    | 60        | 1.7    | 117    | 2   | 1      | 0       | 0          | 1         | 0   | 0   | 0        | 0      | 0      | 0   | 1   | 0       | 0          | 0        | 0         | 1           | 0           | 0          | 1         | 0         | 1 |   |
| 55464972 | 2    | 1        | 2          | 70  | 1    | 1      | 1     | 0    | 0         | 1.69   | 87     | 2   | 1      | 0       | 1          | 0         | 0   | 1   | 1        | 0      | 0      | 0   | 1   | 0       | 1          | 1        | 1         | 1           | 0           | 1          | 0         | 0         | 1 |   |
| 55779649 | 3    | 2        | 2          | 63  | 1    | 1      | 2     | 0    | 0         | 1.55   | 87.5   | 2   | 1      | 1       | 1          | 1         | 0   | 0   | 0        | 0      | 0      | 0   | 1   | 0       | 1          | 1        | 1         | 1           | 1           | 0          | 1         | 0         | 1 |   |
| 55787210 | 3    | 2        | 2          | 63  | 1    | 1      | 2     | 0    | 0         | 1.7    | 80     | 1   | 1      | 0       | 1          | 0         | 0   | 0   | 0        | 0      | 0      | 0   | 0   | 1       | 1          | 1        | 1         | 0           | 1           | 0          | 1         | 0         | 1 |   |
| 90358770 | 1    | 1        | 2          | 59  | 2    | 0      | 2     | 0    | 0         | 1.62   | 58     | 1   | 1      | 1       | 0          | 0         | 0   | 0   | 0        | 0      | 0      | 0   | 1   | 0       | 1          | 0        | 0         | 1           | 0           | 0          | 0         | 0         | 1 |   |
| 55771193 | 3    | 2        | 2          | 40  | 1    | 0      | 2     | 0    | 3         | 1.53   | 102    | 2   | 1      | 0       | 0          | 0         | 0   | 0   | 0        | 0      | 0      | 0   | 0   | 1       | 0          | 0        | 0         | 1           | 0           | 0          | 0         | 0         | 1 |   |
| 55522343 | 3    | 2        | 2          | 58  | 1    | 1      | 1     | 0    | 0         | 1.7    | 70     | 1   | 1      | 0       | 0          | 0         | 2   | 0   | 0        | 0      |        |     |     |         |            |          |           |             |             |            |           |           |   |   |

| k_1a | k_1b | k_1c | k_physlim | k_2 | k_3 | k_4 | k_5 | k_symp | k_6 | k_7 | k_gol | k_8a | k_8b | k_8c | k_soclim | k_tot | k_dic | k_quart | m_1 | m_2 | m_3 | m_4 | m_5 | m_6 | m_7 | m_8 | m_9 | m_10 | m_11 | m_12 | m_13 | m_14 | m_15 | m_16 | m_17 | m_18 | m_19 | m_20 | m_21 | m_fis | m_emo | m_tot | m_dic | m_quart |    |   |   |
|------|------|------|-----------|-----|-----|-----|-----|--------|-----|-----|-------|------|------|------|----------|-------|-------|---------|-----|-----|-----|-----|-----|-----|-----|-----|-----|------|------|------|------|------|------|------|------|------|------|------|------|-------|-------|-------|-------|---------|----|---|---|
| 3    | 3    | 1    | 33        | 5   | 4   | 7   | 5   | 88     | 4   | 3   | 63    | 3    | 3    | 5    | 67       | 63    | 2     | 3       |     | 5   | 5   | 5   | 0   | 0   | 0   | 0   | 5   | 5    | 5    | 5    | 5    | 4    | 0    | 0    | 0    | 5    | 5    | 5    | 5    | 4     | 24    | 24    | 68    | 2       | 3  |   |   |
| 3    | 2    | 2    | 33        | 1   | 2   | 1   | 5   | 29     | 1   | 2   | 13    | 2    | 2    |      | 25       | 25    | 1     | 2       |     | 2   | 5   | 5   | 5   | 0   | 5   | 5   | 5   | 5    | 5    | 2    | 3    | 5    | 5    | 3    | 2    | 3    | 4    | 5    | 35   | 21    | 83    | 2     | 4     |         |    |   |   |
| 1    | 1    | 1    | 0         | 4   | 1   | 7   | 5   | 69     | 1   | 1   | 0     | 1    | 1    | 1    | 0        | 17    | 1     | 1       |     | 2   | 5   | 5   | 5   | 5   | 0   | 5   | 5   | 5    | 5    | 2    | 3    | 5    | 5    | 3    | 2    | 3    | 4    | 5    | 35   | 21    | 83    | 2     | 4     |         |    |   |   |
| 4    | 3    | 2    | 50        | 5   | 2   | 6   | 5   | 75     | 2   | 2   | 25    | 2    | 2    | 2    | 25       | 44    | 1     | 2       |     |     |     |     |     |     |     |     |     |      |      |      |      |      |      |      |      |      |      |      |      |       |       |       |       |         |    |   |   |
| 5    | 3    | 4    | 75        | 5   | 5   | 7   | 5   | 92     | 4   | 3   | 63    | 5    | 2    | 2    | 50       | 70    | 2     | 3       |     |     |     |     |     |     |     |     |     |      |      |      |      |      |      |      |      |      |      |      |      |       |       |       |       |         |    |   |   |
| 3    | 2    | 2    | 33        | 4   | 2   | 4   | 2   | 46     | 2   | 2   | 25    |      | 1    | 3    | 25       | 32    | 1     | 2       |     |     |     |     |     |     |     |     |     |      |      |      |      |      |      |      |      |      |      |      |      |       |       |       |       |         |    |   |   |
| 4    | 2    | 1    | 33        | 2   | 2   | 4   | 1   | 23     | 3   | 1   | 25    | 1    | 3    | 3    | 25       | 27    | 1     | 2       |     |     |     |     |     |     |     |     |     |      |      |      |      |      |      |      |      |      |      |      |      |       |       |       |       |         |    |   |   |
| 4    | 5    | 1    | 58        | 5   | 2   | 7   | 5   | 79     | 1   | 3   | 25    | 1    | 1    |      | 0        | 41    | 1     | 2       |     | 0   | 0   | 5   | 4   | 3   | 0   | 5   | 5   | 5    | 3    | 2    | 4    | 0    | 5    | 0    | 0    | 3    | 4    | 0    | 4    | 23    | 11    | 57    | 2     | 3       |    |   |   |
| 5    | 5    | 5    | 100       | 5   | 7   | 7   | 5   | 100    | 5   | 5   | 100   | 5    | 5    | 5    | 100      | 100   | 2     | 4       |     | 0   | 0   | 0   | 0   | 0   | 0   | 0   | 0   | 0    | 0    | 0    | 0    | 0    | 0    | 0    | 0    | 0    | 0    | 0    | 0    | 0     | 0     | 1     | 1     |         |    |   |   |
| 2    | 3    | 1    | 25        | 1   | 1   | 1   | 5   | 25     | 1   | 1   | 0     | 2    | 1    | 1    | 8        | 15    | 1     | 1       |     | 5   | 5   | 5   | 5   | 5   | 4   | 5   | 5   | 5    | 5    | 5    | 5    | 0    | 0    | 0    | 5    | 5    | 5    | 4    | 4    | 44    | 23    | 87    | 2     | 4       |    |   |   |
| 5    | 5    | 5    | 100       | 5   | 7   | 7   | 5   | 100    | 5   | 5   | 100   | 5    | 5    | 5    | 100      | 100   | 2     | 4       |     |     |     |     |     |     |     |     |     |      |      |      |      |      |      |      |      |      |      |      |      |       |       |       |       |         |    |   |   |
| 3    | 3    | 2    | 42        | 5   | 4   | 6   | 5   | 83     | 2   | 1   | 25    | 3    | 2    | 2    | 25       | 41    | 1     | 2       |     |     |     |     |     |     |     |     |     |      |      |      |      |      |      |      |      |      |      |      |      |       |       |       |       |         |    |   |   |
| 2    | 3    | 1    | 25        | 3   | 4   | 4   | 3   | 50     | 2   | 2   | 25    | 3    | 2    | 2    | 33       | 33    | 1     | 2       |     | 5   | 5   | 5   | 5   | 5   | 5   | 5   | 5   | 5    | 5    | 5    | 5    | 5    | 3    | 5    | 5    | 5    | 2    | 2    | 45   | 19    | 97    | 2     | 4     |         |    |   |   |
| 5    | 3    |      | 75        | 4   | 5   | 7   | 5   | 85     | 5   | 3   | 75    | 2    | 2    |      | 58       | 56    | 2     | 4       |     |     |     |     |     |     |     |     |     |      |      |      |      |      |      |      |      |      |      |      |      |       |       |       |       |         |    |   |   |
| 5    | 5    | 3    | 83        | 3   | 7   | 7   | 5   | 88     | 5   | 3   | 75    | 3    | 3    | 5    | 67       | 78    | 2     | 4       |     | 3   | 0   | 5   | 0   | 0   | 0   | 0   | 5   | 0    | 0    | 3    | 3    | 0    | 0    | 0    | 0    | 0    | 3    | 3    | 0    | 14    | 6     | 25    | 1     | 1       |    |   |   |
| 5    | 3    | 2    | 58        | 3   | 5   | 5   | 5   | 71     | 4   | 3   | 63    | 4    | 4    | 5    | 83       | 69    | 2     | 3       |     | 0   | 0   | 4   | 4   | 3   | 0   | 0   | 5   | 4    | 2    | 4    | 4    | 3    | 0    | 4    | 0    | 3    | 2    | 4    | 3    | 4     | 18    | 16    | 53    | 2       | 3  |   |   |
| 5    | 5    | 5    | 100       | 5   | 6   | 6   | 5   | 92     | 5   | 4   | 88    | 4    | 3    | 5    | 75       | 89    | 2     | 4       |     | 5   | 5   | 5   | 5   | 5   | 4   | 5   | 5   | 5    | 5    | 5    | 5    | 5    | 0    | 0    | 0    | 5    | 5    | 5    | 5    | 5     | 5     | 44    | 25    | 89      | 2  | 4 |   |
| 3    | 1    | 1    | 17        | 5   | 2   | 2   | 2   | 40     | 2   | 2   | 25    | 3    | 2    | 1    | 25       | 27    | 1     | 2       |     | 5   | 5   | 5   | 5   | 5   | 4   | 5   | 5   | 5    | 5    | 5    | 5    | 5    | 5    | 0    | 0    | 0    | 5    | 5    | 5    | 5     | 5     | 5     | 44    | 25      | 89 | 2 | 4 |
| 2    | 2    | 1    | 17        | 5   | 1   | 1   | 2   | 31     | 2   | 2   | 25    | 3    | 2    | 1    | 25       | 24    | 1     | 1       |     |     |     |     |     |     |     |     |     |      |      |      |      |      |      |      |      |      |      |      |      |       |       |       |       |         |    |   |   |
| 5    | 3    | 2    | 58        | 3   | 4   | 3   | 5   | 58     | 3   | 3   | 50    | 3    | 3    | 4    | 58       | 56    | 2     | 3       |     |     |     |     |     |     |     |     |     |      |      |      |      |      |      |      |      |      |      |      |      |       |       |       |       |         |    |   |   |
| 5    | 4    | 3    | 75        | 4   | 5   | 4   | 5   | 73     | 4   | 3   | 63    | 4    | 3    |      | 63       | 68    | 2     | 3       |     | 2   | 3   | 2   | 1   | 0   | 5   | 5   | 5   | 2    | 2    | 5    | 2    | 3    | 0    | 5    | 5    | 3    | 2    | 5    | 4    | 5     | 23    | 19    | 66    | 2       | 3  |   |   |
| 2    | 2    | 2    | 25        | 5   | 1   | 4   | 2   | 44     | 2   | 1   | 13    | 2    | 2    |      | 25       | 27    | 1     | 2       |     |     |     |     |     |     |     |     |     |      |      |      |      |      |      |      |      |      |      |      |      |       |       |       |       |         |    |   |   |
| 3    | 2    | 1    | 25        | 3   | 2   | 2   | 2   | 27     | 1   | 1   | 0     | 1    | 2    | 1    | 8        | 15    | 1     | 1       |     | 3   | 4   | 4   | 4   | 5   | 4   | 5   | 5   | 5    | 5    | 4    | 4    | 4    | 5    | 5    | 5    | 5    | 5    | 5    | 5    | 5     | 37    | 25    | 95    | 2       | 4  |   |   |
| 4    | 2    |      | 50        | 1   | 3   | 3   | 1   | 17     | 2   | 1   | 13    | 2    | 2    | 2    | 25       | 26    | 1     | 2       |     | 0   | 3   | 5   | 3   | 4   | 3   | 0   | 0   | 5    | 4    | 3    | 4    | 2    | 0    | 0    | 3    | 0    | 1    | 5    | 0    | 3     | 24    | 9     | 48    | 1       | 2  |   |   |
| 4    | 2    | 2    | 42        | 5   | 4   | 3   | 3   | 58     | 3   | 3   | 50    | 3    | 3    | 5    | 67       | 54    | 2     | 3       |     | 0   | 3   | 5   | 3   | 4   | 3   | 0   | 0   | 5    | 4    | 3    | 4    | 2    | 0    | 0    | 3    | 0    | 1    | 5    | 0    | 3     | 24    | 9     | 48    | 1       | 2  |   |   |
| 5    | 4    | 1    | 58        | 5   | 7   | 7   | 5   | 100    | 5   | 5   | 100   | 5    | 5    |      | 100      | 90    | 2     | 4       |     | 5   | 5   | 5   | 5   | 5   | 5   | 5   | 5   | 5    | 5    | 5    | 5    | 5    | 0    | 5    | 5    | 0    | 3    | 5    | 5    | 5     | 45    | 18    | 93    | 2       | 4  |   |   |
| 2    | 1    | 1    | 8         | 1   | 1   | 1   | 1   | 0      | 1   | 1   | 0     | 1    | 1    | 1    | 0        | 2     | 1     | 2       |     |     |     |     |     |     |     |     |     |      |      |      |      |      |      |      |      |      |      |      |      |       |       |       |       |         |    |   |   |
| 5    | 5    | 5    | 100       | 5   | 7   | 7   | 5   | 100    | 5   | 4   | 88    | 5    | 5    | 5    | 100      | 97    | 2     | 4       |     | 5   | 5   | 5   | 5   | 5   | 5   | 5   | 5   | 5    | 5    | 5    | 5    | 5    | 5    | 0    | 5    | 5    | 0    | 3    | 5    | 5     | 5     | 5     | 45    | 18      | 93 | 2 | 4 |
| 3    | 3    | 1    | 33        | 3   | 2   | 2   | 5   | 46     | 4   | 3   | 63    | 3    | 1    | 3    | 33       | 44    | 1     | 2       |     | 3   | 5   | 5   | 5   | 3   | 4   | 0   | 5   | 5    | 4    | 3    | 5    | 5    | 0    | 5    | 3    | 4    | 5    | 5    | 35   | 23    | 83    | 2     | 4     |         |    |   |   |
| 5    | 5    | 1    | 67        | 4   | 1   | 3   | 1   | 27     | 2   | 2   | 25    | 2    | 1    | 1    | 8        | 32    | 1     | 2       |     | 0   | 0   | 3   | 0   | 0   | 0   | 0   | 0   | 5    | 0    | 2    | 0    | 0    | 0    | 0    | 0    | 0    | 3    | 0    | 0    | 5     | 3     | 13    | 1     | 1       |    |   |   |
| 5    | 3    | 2    | 58        | 5   | 5   | 5   | 5   | 83     | 5   | 3   | 75    | 3    | 3    | 3    | 50       | 67    | 2     | 3       |     | 0   | 0   | 4   | 4   | 4   | 0   | 0   | 5   | 5    | 5    | 0    | 0    | 0    | 0    | 0    | 0    | 0    | 0    | 4    | 0    | 12    | 4     | 31    | 1     | 2       |    |   |   |
| 5    | 5    | 4    | 92        | 5   | 7   | 7   | 5   | 100    | 5   | 5   | 100   | 5    | 5    | 5    | 100      | 98    | 2     | 4       |     | 0   | 0   | 0   | 0   | 0   | 0   | 0   | 1   | 0    | 1    | 0    | 1    | 0    | 2    | 1    | 0    | 0    | 0    | 0    | 0    | 1     | 0     | 6     | 6     | 1       | 1  |   |   |
| 3    | 1    |      | 25        | 5   | 2   | 7   | 5   | 79     | 2   | 1   | 13    | 2    | 1    |      | 13       | 32    | 1     | 2       |     |     |     |     |     |     |     |     |     |      |      |      |      |      |      |      |      |      |      |      |      |       |       |       |       |         |    |   |   |
| 5    | 5    | 4    | 92        | 5   | 5   | 5   | 5   | 83     | 4   | 3   | 63    | 3    | 3    | 3    | 2        | 42    | 70    | 2       | 3   |     | 0   | 3   | 3   | 0   | 0   | 0   | 0   | 3    | 5    | 0    | 3    | 3    | 0    | 0    | 0    | 0    | 0    | 0    | 0    | 3     | 12    | 3     | 23    | 1       | 1  |   |   |
| 5    | 2    | 1    | 42        | 3   | 4   | 2   | 3   | 33     | 2   | 1   | 13    | 2    | 2    | 2    | 33       | 30    | 1     | 2       |     |     |     |     |     |     |     |     |     |      |      |      |      |      |      |      |      |      |      |      |      |       |       |       |       |         |    |   |   |
| 5    | 2    | 2    | 50        | 2   | 1   | 1   | 1   | 6      | 1   | 1   | 0     | 1    | 1    | 1    | 0        | 14    | 1     | 1       |     | 5   | 5   | 5   | 5   | 5   | 5   | 5   | 5   | 5    | 5    | 5    | 5    | 5    | 5    | 5    | 5    | 5    | 5    | 5    | 5    | 45    | 25    | 105   | 2     | 4       |    |   |   |
| 5    | 3    | 3    | 67        | 5   | 6   | 6   | 5   | 92     | 3   | 3   | 50    | 3    | 3    | 3    | 50       | 65    | 2     | 3       |     | 0   | 0   | 1   | 1   | 0   | 0   | 2   | 0   | 2    | 1    | 0    | 1    | 0    | 1    | 1    | 0    | 1    | 0    | 0    | 4    | 2     | 13    | 1     | 1     |         |    |   |   |
| 3    |      | 2    | 38        | 2   | 4   | 3   | 3   | 40     | 5   | 3   | 75    | 2    | 2    | 2    | 25       | 44    | 1     | 2       |     | 3   | 5   | 4   | 5   | 4   | 3   | 3   | 5   | 3    | 4    | 5    | 1    | 3    | 0    | 0    | 3    | 0    | 1    | 2    | 0    | 0     | 31    | 3     | 54    | 2       | 3  |   |   |
| 3    |      |      |           | 1   | 5   | 1   | 5   | 42     | 2   | 1   | 13    | 1    | 1    | 1    | 6        | 42    | 32    | 1       | 2   |     |     |     |     |     |     |     |     |      |      |      |      |      |      |      |      |      |      |      |      |       |       |       |       |         |    |   |   |
| 4    | 2    | 1    | 33        | 5   | 6   | 7   | 5   | 96     | 2   | 2   | 25    | 3    | 1    | 2    | 25       | 45    | 1     | 2       |     |     |     |     |     |     |     |     |     |      |      |      |      |      |      |      |      |      |      |      |      |       |       |       |       |         |    |   |   |
| 3    | 2    |      | 38        | 4   | 4   | 6   | 5   | 77     | 3   | 1   | 25    | 1    | 2    | 2    | 17       | 39    | 1     | 2       |     |     |     |     |     |     |     |     |     |      |      |      |      |      |      |      |      |      |      |      |      |       |       |       |       |         |    |   |   |
| 2    | 3    | 2    | 33        | 5   | 2   | 2   | 2   | 40     | 3   | 5   | 75    | 3    | 3    | 3    | 42       | 47    | 1     | 2       |     |     |     |     |     |     |     |     |     |      |      |      |      |      |      |      |      |      |      |      |      |       |       |       |       |         |    |   |   |
| 3    |      |      |           | 5   | 7   | 7   | 5   | 100    | 5   | 5   | 100   | 5    | 5    |      | 100      | 100   | 2     | 4       |     | 0   | 0   | 0   | 0   | 0   | 0   | 0   | 0   | 0    | 0    | 0    | 0    | 0    | 0    | 0    | 0    | 0    | 0    | 0    | 0    | 0     | 0     | 0     | 1     | 1       |    |   |   |
| 3    | 5    | 3    | 67        | 3   | 5   | 7   | 3   | 67     | 3   | 2   | 38    | 3    | 3    | 4    | 58       | 57    | 2     | 3       |     | 4   | 3   | 2   | 3   | 4   | 3   | 3   | 4   | 3    | 3    | 3    | 4    | 3    | 2    | 4    | 2    | 4    | 4    | 1    | 1    | 29    | 14    | 64    | 2     | 3       |    |   |   |
| 3    | 3    | 3    | 50        | 5   | 5   | 5   | 3   | 71     | 3   | 3   | 50    | 3    | 2    |      | 38       | 52    | 2     | 3       |     | 0   | 2   | 4   | 3   | 4   | 5   | 4   | 3   | 2    | 4    | 4    | 3    | 2    | 4    | 5    | 3    | 0    | 2    | 4    | 3    | 4     | 27    | 13    | 65    | 2       | 3  |   |   |
| 3    | 2    | 2    | 33        | 4   | 2   | 2   | 1   | 27     | 1   | 3   | 25    | 1    | 1    | 1    | 0        | 21    | 1     | 1       |     | 5   | 5   | 5   | 5   | 4   | 5   | 4   | 5   | 5    | 5    | 5    | 5    | 0    | 3    | 3    | 4    | 5    | 3    | 5    | 43   | 20    | 89    | 2     | 4     |         |    |   |   |
| 2    | 2    |      | 25        | 2   | 2   | 2   | 1   | 15     | 2   | 2   | 25    | 2    | 1    |      |          |       |       |         |     |     |     |     |     |     |     |     |     |      |      |      |      |      |      |      |      |      |      |      |      |       |       |       |       |         |    |   |   |

|   | k_1b | k_1c | k_hybrid | k_2 | k_3 | k_4 | k_5 | k_symp | k_6 | k_7 | k_8 | k_8a | k_8b | k_8c | k_sodium | k_7tot | k_dic | k_quart | m_1 | m_2 | m_3 | m_4 | m_5 | m_6 | m_7 | m_8 | m_9 | m_10 | m_11 | m_12 | m_13 | m_14 | m_15 | m_16 | m_17 | m_18 | m_19 | m_20 | m_21 | m_fis | m_emo | m_tot | m_dlc | m_quart |   |
|---|------|------|----------|-----|-----|-----|-----|--------|-----|-----|-----|------|------|------|----------|--------|-------|---------|-----|-----|-----|-----|-----|-----|-----|-----|-----|------|------|------|------|------|------|------|------|------|------|------|------|-------|-------|-------|-------|---------|---|
| 1 | 3    | 1    | 2        | 58  | 5   | 5   | 6   | 5      | 88  | 4   | 3   | 63   | 4    | 4    | 75       | 71     | 2     | 3       | 1   | 0   | 2   | 0   | 0   | 0   | 0   | 0   | 0   | 0    | 0    | 5    | 0    | 0    | 0    | 10   | 0    | 0    | 0    | 0    | 0    | 21    | 4     | 26    | 1     | 1       |   |
| 2 | 4    | 2    | 42       | 5   | 5   | 7   | 3   | 79     | 3   | 3   | 50  | 3    | 3    | 4    | 58       | 57     | 2     | 3       | 0   | 0   | 2   | 0   | 2   | 4   | 3   | 4   | 2   | 3    | 0    | 5    | 2    | 0    | 0    | 0    | 0    | 0    | 2    | 2    | 0    | 21    | 4     | 36    | 1     | 2       |   |
| 3 | 3    | 1    | 33       | 5   | 3   | 2   | 5   | 63     | 3   | 2   | 50  | 3    | 2    | 2    | 33       | 42     | 1     | 2       | 0   | 5   | 5   | 4   | 5   | 5   | 0   | 5   | 5   | 5    | 3    | 5    | 3    | 5    | 0    | 0    | 2    | 0    | 5    | 5    | 32   | 15    | 72    | 2     | 3     |         |   |
| 3 | 4    | 1    | 33       | 5   | 2   | 5   | 5   | 58     | 3   | 3   | 42  | 3    | 2    | 4    | 58       | 52     | 4     | 2       | 0   | 0   | 0   | 0   | 0   | 0   | 0   | 0   | 0   | 0    | 0    | 0    | 0    | 0    | 0    | 0    | 0    | 0    | 0    | 0    | 0    | 0     | 0     | 0     | 0     | 0       |   |
| 4 | 3    | 1    | 50       | 3   | 4   | 4   | 5   | 63     | 3   | 3   | 50  | 3    | 3    | 3    | 50       | 53     | 2     | 3       | 4   | 5   | 4   | 4   | 4   | 3   | 0   | 3   | 3   | 3    | 0    | 0    | 3    | 4    | 0    | 0    | 0    | 0    | 3    | 4    | 0    | 27    | 7     | 47    | 1     | 2       |   |
| 4 | 3    | 1    | 42       | 5   | 4   | 4   | 1   | 50     | 3   | 3   | 50  | 3    | 3    | 3    | 50       | 47     | 1     | 2       | 0   | 5   | 5   | 4   | 4   | 3   | 4   | 0   | 0   | 3    | 0    | 2    | 3    | 4    | 0    | 2    | 0    | 0    | 0    | 4    | 5    | 4     | 28    | 13    | 48    | 1       | 2 |
| 3 | 3    | 2    | 42       | 5   | 5   | 5   | 5   | 83     | 3   | 3   | 50  | 3    | 4    | 5    | 75       | 63     | 2     | 3       | 0   | 0   | 3   | 3   | 3   | 3   | 0   | 4   | 3   | 0    | 5    | 5    | 0    | 0    | 0    | 0    | 0    | 0    | 0    | 0    | 0    | 22    | 0     | 32    | 1     | 2       |   |
| 5 | 4    | 2    | 88       | 5   | 5   | 7   | 5   | 92     | 4   | 4   | 75  | 5    | 4    | 4    | 83       | 84     | 2     | 4       | 0   | 0   | 2   | 0   | 0   | 0   | 0   | 0   | 0   | 1    | 0    | 0    | 3    | 0    | 5    | 0    | 0    | 0    | 2    | 1    | 2    | 5     | 5     | 16    | 1     | 1       |   |
| 1 | 1    | 1    | 0        | 5   | 2   | 1   | 1   | 33     | 2   | 2   | 0   | 1    | 1    | 1    | 0        | 15     | 1     | 1       | 5   | 5   | 5   | 2   | 3   | 5   | 4   | 5   | 5   | 5    | 3    | 5    | 5    | 4    | 3    | 3    | 3    | 3    | 5    | 2    | 3    | 39    | 16    | 83    | 2     | 4       |   |
| 2 | 2    | 1    | 17       | 2   | 2   | 1   | 1   | 25     | 1   | 1   | 2   | 1    | 1    | 1    | 8        | 13     | 1     | 1       | 0   | 1   | 2   | 2   | 2   | 1   | 1   | 1   | 5   | 2    | 5    | 5    | 2    | 2    | 0    | 4    | 5    | 5    | 5    | 3    | 2    | 13    | 20    | 59    | 2     | 3       |   |
| 4 | 4    | 2    | 58       | 5   | 4   | 5   | 5   | 79     | 4   | 3   | 63  | 2    | 2    | 1    | 17       | 54     | 2     | 3       | 1   | 3   | 3   | 2   | 3   | 3   | 3   | 2   | 2   | 3    | 2    | 3    | 3    | 2    | 3    | 3    | 2    | 3    | 3    | 23   | 14   | 55    | 2     | 3     |       |         |   |
| 5 | 3    | 3    | 67       | 2   | 5   | 5   | 3   | 52     | 4   | 3   | 63  | 2    | 4    | 4    | 58       | 60     | 2     | 3       | 1   | 3   | 3   | 2   | 3   | 3   | 3   | 3   | 2   | 2    | 3    | 2    | 3    | 3    | 2    | 3    | 3    | 3    | 3    | 23   | 14   | 55    | 2     | 3     |       |         |   |
| 3 | 3    | 1    | 33       | 4   | 1   | 1   | 1   | 19     | 2   | 2   | 25  | 2    | 3    | 3    | 42       | 30     | 1     | 2       | 2   | 5   | 5   | 4   | 4   | 5   | 4   | 5   | 4   | 5    | 4    | 4    | 5    | 1    | 4    | 5    | 5    | 4    | 5    | 5    | 4    | 38    | 23    | 90    | 2     | 4       |   |
| 3 | 2    | 2    | 33       | 3   | 2   | 3   | 5   | 50     | 3   | 3   | 50  | 2    | 2    | 2    | 25       | 40     | 1     | 2       | 0   | 0   |     |     |     |     |     |     |     |      |      |      |      |      |      |      |      |      |      |      |      |       |       |       |       |         |   |

Table S2. Available Data 2

| Subtitle                      |                                                                                                                                                     |                                                                                                                                                                |                                                                                                                                                                                             |                                                                                                                  |
|-------------------------------|-----------------------------------------------------------------------------------------------------------------------------------------------------|----------------------------------------------------------------------------------------------------------------------------------------------------------------|---------------------------------------------------------------------------------------------------------------------------------------------------------------------------------------------|------------------------------------------------------------------------------------------------------------------|
| data not collected or missing |                                                                                                                                                     |                                                                                                                                                                |                                                                                                                                                                                             |                                                                                                                  |
| sex:                          | 0 female<br>1 male                                                                                                                                  | hr: hospital record<br>nyha_dic: nyha dicotomizado<br>nyha: New York Heart Association                                                                         | k_1a question 1a of KCCQ-12<br>k_1b question 1b of KCCQ-12<br>k_1c question 1c of KCCQ-12                                                                                                   | m_1 question 1 of MLHFQ<br>m_2 question 2 of MLHFQ<br>m_3 question 3 of MLHFQ                                    |
| etiol                         | 1 ischemic<br>2 non-ischemic                                                                                                                        | bmi: body index mass<br>hipert: hipertensão arterial sistêmica<br>diabete: diabetes mellitus                                                                   | k_physlim Score of the domain - Physical Limitation<br>k_2 question 2 of KCCQ-12<br>k_3 question 3 of KCCQ-12                                                                               | m_4 question 4 of MLHFQ<br>m_5 question 5 of MLHFQ<br>m_6 question 6 of MLHFQ                                    |
| smok                          | 0 non-smoker or ex-smoker<br>1 active smoker                                                                                                        | atrialfyb: atrial fibrillation<br>ami: ainfarto agudo do miocardio<br>renaldis: doença renal crônica                                                           | k_4 question 4 of KCCQ-12<br>k_5 question 5 of KCCQ-12<br>k_symp Score of the domain - Symptoms                                                                                             | m_7 question 7 of MLHFQ<br>m_8 question 8 of MLHFQ<br>m_9 question 9 of MLHFQ                                    |
| comorbidities                 | 0 no<br>1 yes                                                                                                                                       | KCCQ - 12: Kansas city cardiomyopathy questionnaire-12<br>MLHFQ: minnesota living heart failure questionnaire<br>ACI: Angiotensin-converting enzyme inhibitors | k_6 question 6 of KCCQ-12<br>k_7 question 7 of KCCQ-12<br>k_qol Score of the domain - Quality of Life                                                                                       | m_10 question 10 of MLHFQ<br>m_11 question 11 of MLHFQ<br>m_12 question 12 of MLHFQ                              |
| crt                           | 0 absence of device<br>1 pacemaker<br>2 implantable cardioverter-defibrillator                                                                      | ARB: Angiotensin receptor blockers<br>Other antihyp: Other antihypertensive drugs<br>QoL: Quality of Life                                                      | k_8a question 8a of KCCQ-12<br>k_8b question 8b of KCCQ-12<br>k_8c question 8c of KCCQ-12                                                                                                   | m_13 question 13 of MLHFQ<br>m_14 question 14 of MLHFQ<br>m_15 question 15 of MLHFQ                              |
| nyha_ajt                      | 1 classes I and II<br>2 classes III and IV                                                                                                          |                                                                                                                                                                | k_soclim Score of the domain - Social Limitation<br>k_tot escore total do KCCQ-12<br>k_dic Overall score of KCCQ-12 dichotomized<br>k_quart Overall score of KCCQ-12 divided into quartiles | m_16 question 16 of MLHFQ<br>m_17 question 17 of MLHFQ<br>m_18 question 18 of MLHFQ<br>m_19 question 19 of MLHFQ |
| lvef                          | 1 LVEF ≤ 30%<br>2 LVEF >30%                                                                                                                         |                                                                                                                                                                |                                                                                                                                                                                             | m_20 question 20 of MLHFQ<br>m_21 question 21 of MLHFQ<br>m_tot Overall score of MLHFQ<br>Overall score of MLHFQ |
| bmi                           | 1 < 30.0kg/m2<br><br>2 ≥ 30.0kg/m2                                                                                                                  |                                                                                                                                                                |                                                                                                                                                                                             | m_dic dichotomized<br>Overall score of MLHFQ                                                                     |
| Scholarity:                   | 1 Illiterate or elementary school ≤ 4 years<br>2 Incomplete elementary school > 4 years or higher level of education                                |                                                                                                                                                                |                                                                                                                                                                                             | m_quart divided into quartiles<br>m_fis MLHFQ Physical Domain<br>m_emo MLHFQ Emotional Domain                    |
| k_dic                         | 1 ≤ 49 pontos (very poor to fair quality of life)<br>2 ≥ 50 pontos (fair to excellent quality of life)                                              |                                                                                                                                                                |                                                                                                                                                                                             |                                                                                                                  |
| k_quart                       | 1 (0-24 pontos -Very poor to poor QoL)<br>2 (25-49 - Very poor to fair QoL)<br>3 (50-74 - Fair to good QoL)<br>4 (75 - 100 - Good to excellent QoL) |                                                                                                                                                                |                                                                                                                                                                                             |                                                                                                                  |
| m_dic                         | 1 ≤ 52 pontos (Fair to excellent QoL)<br>2 ≥ 53 pontos (Very poor to fair QoL)                                                                      |                                                                                                                                                                |                                                                                                                                                                                             |                                                                                                                  |
| m_quart                       | 1 (0-26 pontos - Good to excellent QoL)<br>2 (27-52 - Fair to good QoL)<br>3 (53-78 - Fair to poor QoL)<br>4 (79-105 - Poor to very poor QoL)       |                                                                                                                                                                |                                                                                                                                                                                             |                                                                                                                  |
